# Supplementary material
Source: PubMed Central journal article supplement (PMC6994159)
Supplement: jci-130-131493-s343.pdf [file jci-130-131493-s343.pdf]

## Supp Figure 1

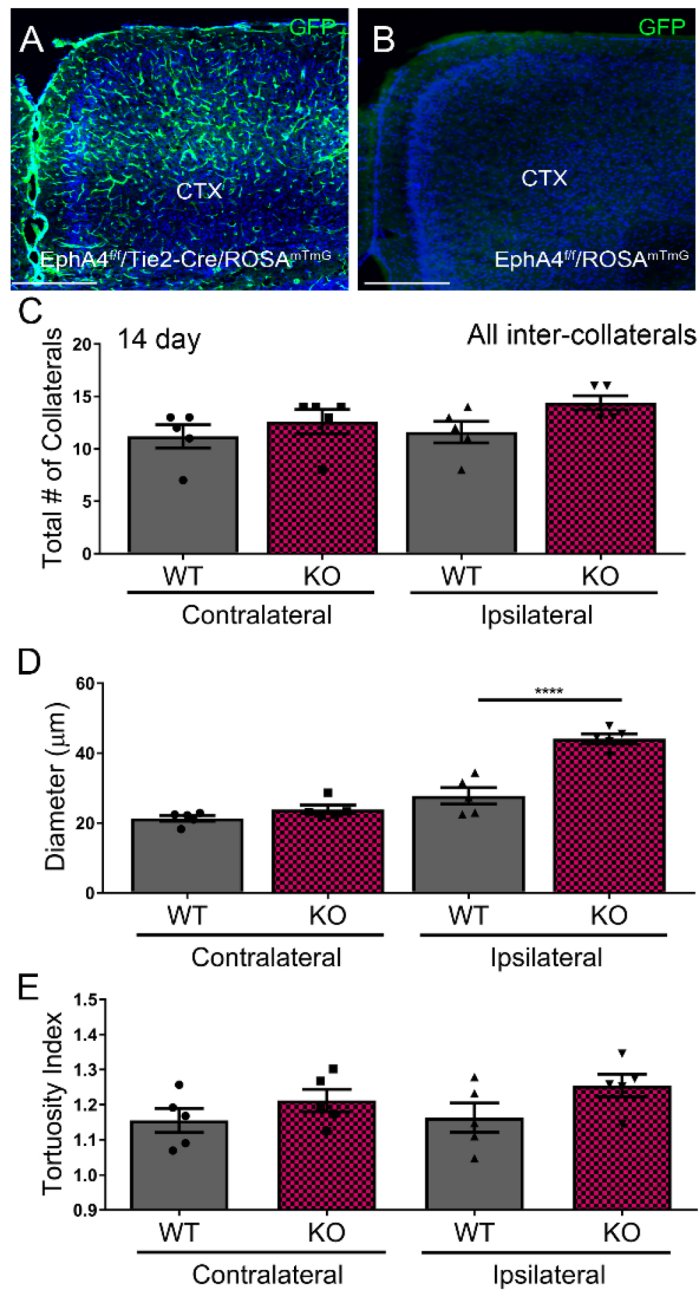

**Supplemental Figure 1. Genetic deletion of EphA4 using Tie2-Cre mice.** (A) EphA4<sup>f/f</sup>/Tie2-Cre mice were bred to ROSA<sup>mTmG</sup> mice. GFP expression in the adult EphA4<sup>f/f</sup>/Tie2-Cre/ROSA<sup>mTmG</sup> brain is restricted to blood vessels compared to lack of GFP expression in (B) EphA4<sup>f/f</sup>/ROSA<sup>mTmG</sup> mice. (C-E) Quantitative analysis of collateral number, size and tortuosity index at 14d post-pMCAO in WT and KO mice, respectively. A-B Scale Bar=500 $\mu\text{M}$ . n=5 mice/group.

## Supp Figure 2

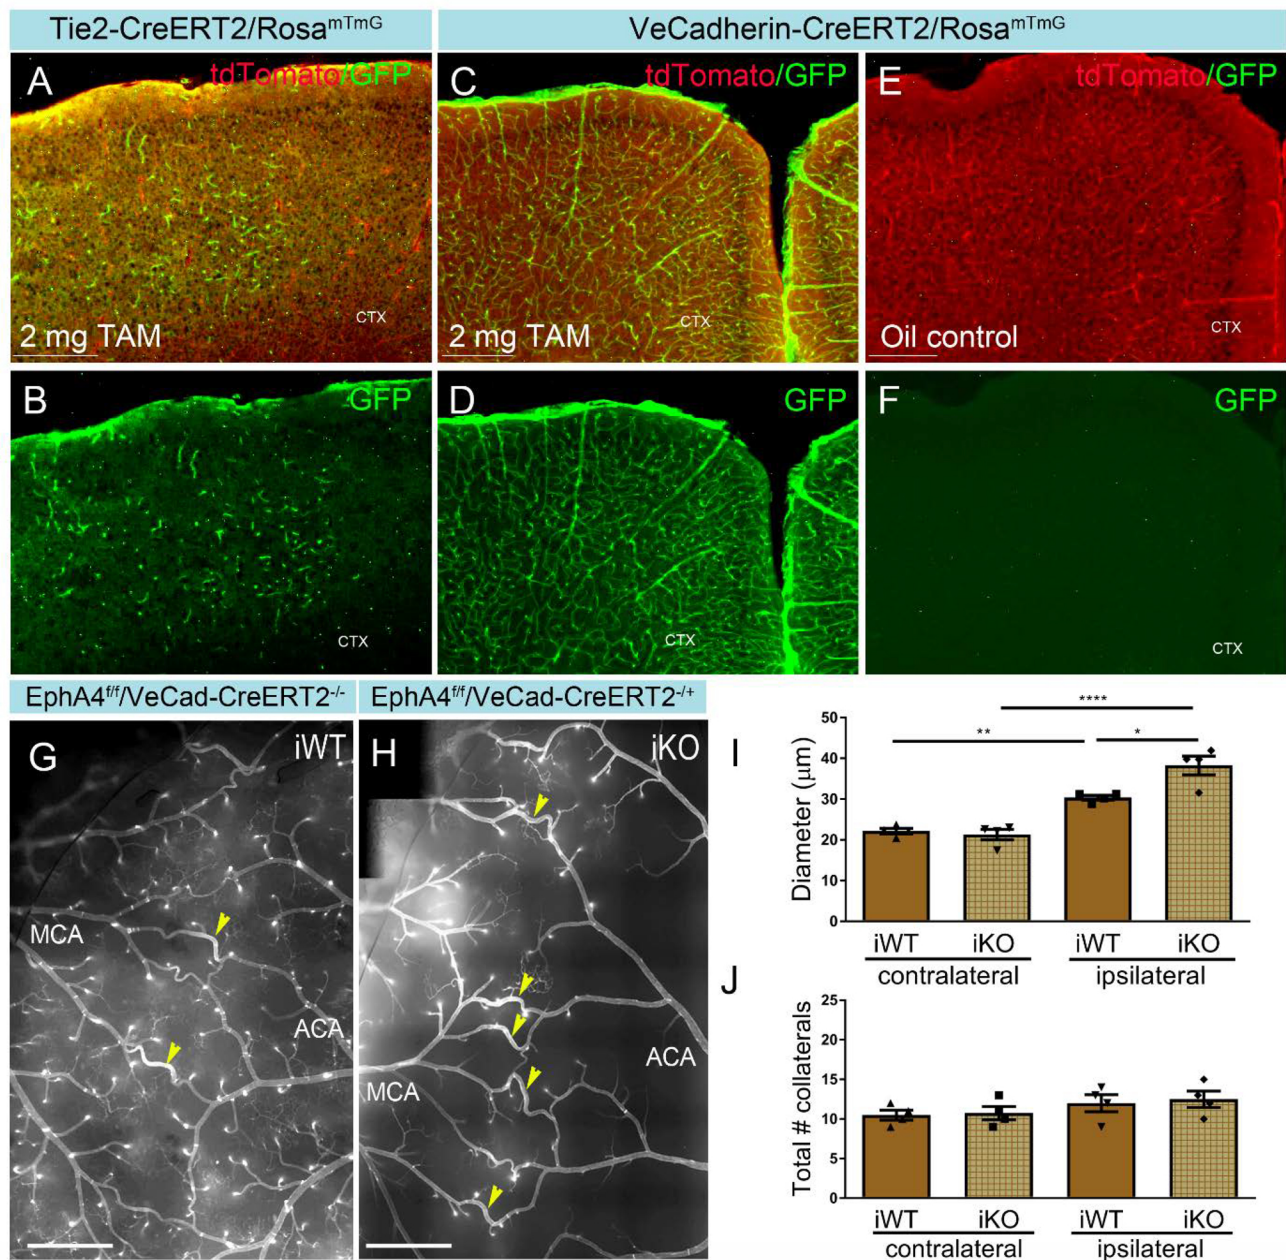

**Supplemental Figure 2. Inducible knockout of EphA4 using Vecdherin-CreERT2 mice enhances pial collateral remodeling after pMCAO.** Tie2-CreERT2 and Vecadherin-CreERT2 mice were bred to ROSA<sup>mTmG</sup> mice. GFP expression in the brain of Tie2-CreERT2/ROSA<sup>mTmG</sup> showed incomplete recombination 2-weeks following 2 mg/kg/day injections of tamoxifen for 5 consecutive days (A, B). Complete recombination was, however, seen in VeCadherin-CreERT2/ROSA<sup>mTmG</sup> mice (C, D) following tamoxifen treatment compared vehicle oil control (E, F). EphA4<sup>fl/fl</sup>/VeCadherin-CreERT2<sup>+/-</sup> mice (iKO) (G-I) subjected to pMCAO 2-weeks post-tamoxifen injections showed a significant increase in pial collateral diameter (μm) at 1d compared to EphA4<sup>fl/fl</sup>/VeCadherin-CreERT2<sup>-/-</sup> mice (iWT) (G). No difference was seen in the total number of collaterals (J). All scale bars= 500 μm. n=4-5 mice per group.

# Supp Figure 3

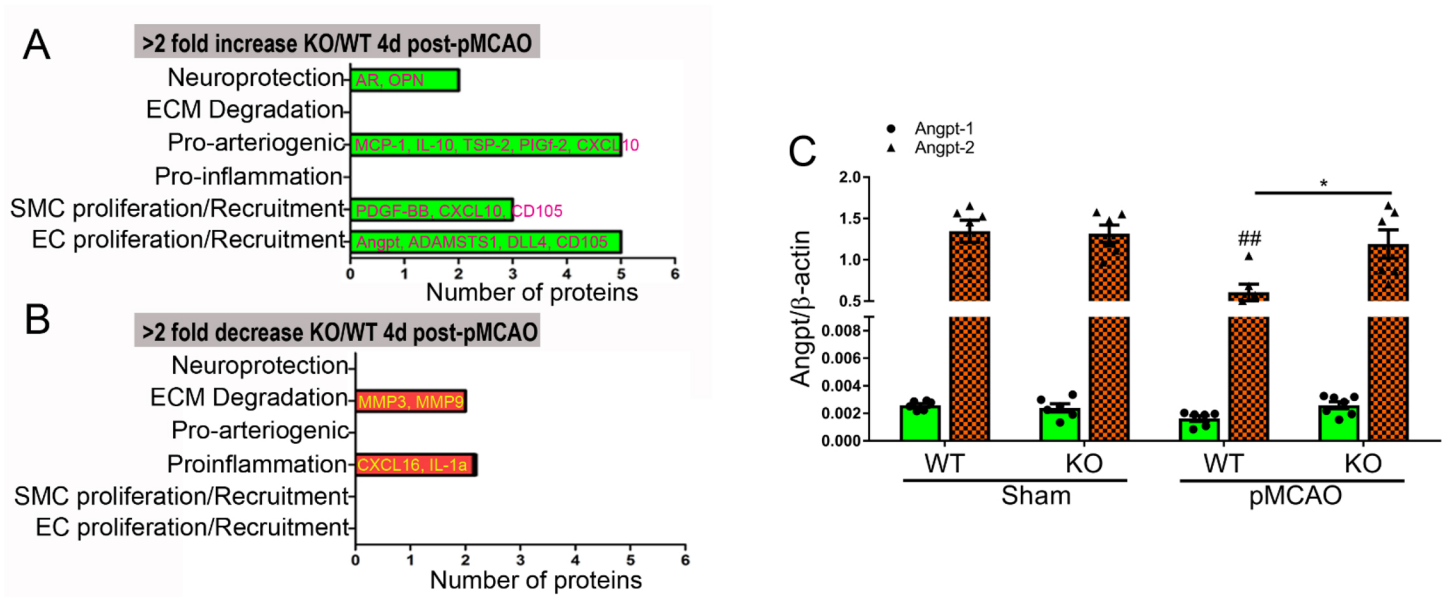

**Supplemental Figure 3. Angiogenic profile analysis and quantified Angpt-1 and -2 protein expression in WT and KO mice.** Cortical protein lysate analysis of angiogenic expression using R&D angiogenic proteome profiler at 4d post-pMCAO. (A) Increased expression >2-fold and (B) decreased expression <2-fold in KO-injured compared to WT-injured mice. Quantified expression of Angpt-1 (green) and -2 (orange) relative to  $\beta$ -actin, following 1d post-pMCAO using western blot analysis from WT and KO ipsilateral cortical protein lysate. \* $P < 0.05$  WT pMCAO compared to KO pMCAO. ## $P < 0.01$  compared to WT sham.  $n = 6-7$  mice per group.

## Supp Figure 4

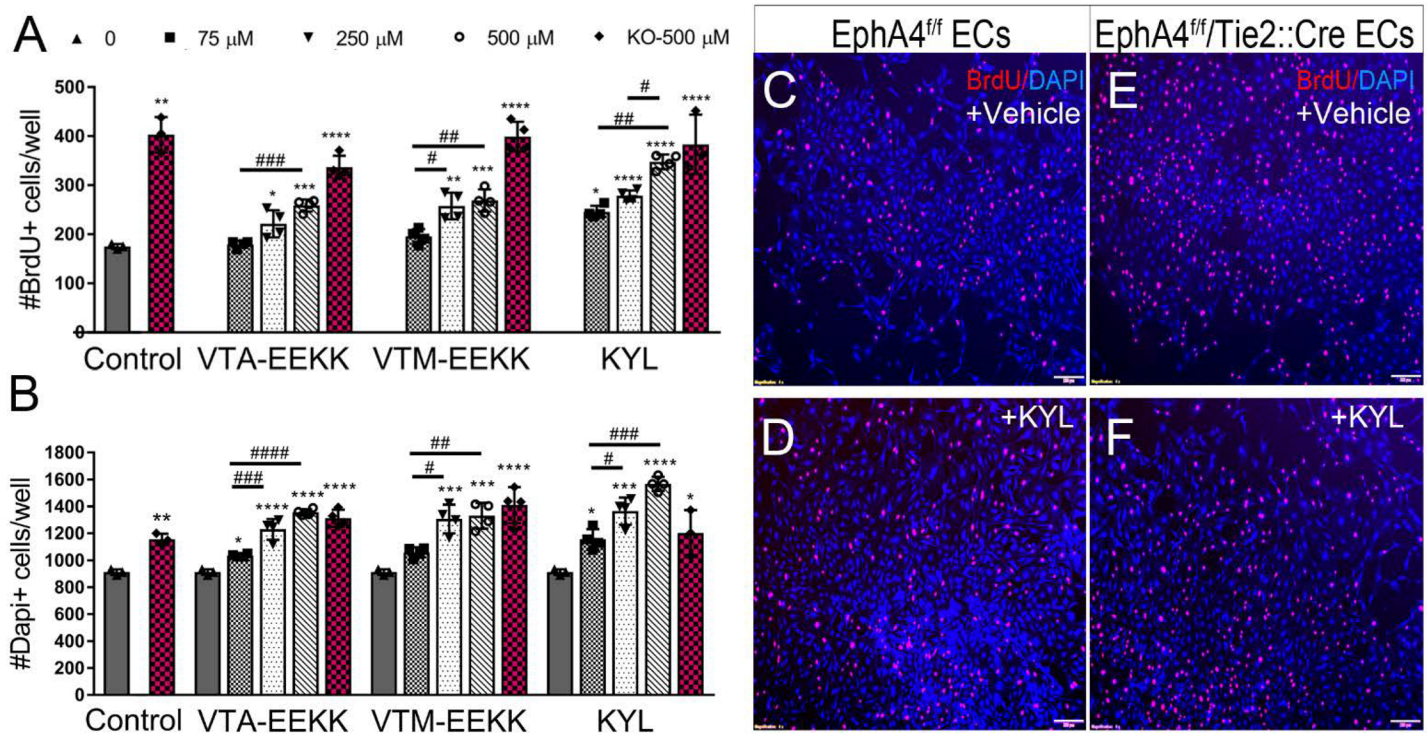

**Supplemental Figure 4. EphA4 peptide inhibitors KYL and VTM-EEKK enhance brain-derived EC proliferation.** (A) Quantified total number of BrdU-positive WT and EphA4-null ECs at 24 hrs following a dose dependent treatment of VTA-EEKK, VTM-EEKK and KYL. A significant increase in BrdU-positive cells were observed in untreated KO ECs and in all treatment groups at 250 $\mu\text{M}$  and 500 $\mu\text{M}$  compared to untreated WT ECs (\*). (B) The number of DAPI-positive cells was also increased in untreated KO ECs and following 250 $\mu\text{M}$  and 500 $\mu\text{M}$  peptide treatment compared to untreated WT ECs. (C-F) Representative immunofluorescence images of BrdU/DAPI stained WT and KO ECs treated with 500 $\mu\text{M}$  KYL. \* $P < 0.05$ , \*\* $P < 0.01$ , \*\*\* $P < 0.001$ , \*\*\*\* $P < 0.0001$  compared to vehicle control treated WT ECs. # $P < 0.05$ , ## $P < 0.01$ , ### $P < 0.001$ , #### $P < 0.0001$  compared to corresponding treatment. Scale in C-F = 200 $\mu\text{m}$ ; 4x magnification. One-way ANOVA with Bonferroni post-hoc was performed per treatment. Each experiment was performed in triplicate and repeated 4 times.
